# Supplementary material for: Prevalence of peripheral and extra-articular disease in ankylosing spondylitis versus non-radiographic axial spondyloarthritis: a meta-analysis
Source: PubMed Central journal article supplement (PMC5009714; doi:10.1186/s13075-016-1093-z), 2016-09-01
Supplement: 13075_2016_1093_MOESM1_ESM.pdf [file 13075_2016_1093_MOESM1_ESM.pdf]

| PICO                                                                               |                |                                                                                        |                                                                                                                                                                                      |
|------------------------------------------------------------------------------------|----------------|----------------------------------------------------------------------------------------|--------------------------------------------------------------------------------------------------------------------------------------------------------------------------------------|
| Patients                                                                           | "Intervention" | Control                                                                                | "Outcome"                                                                                                                                                                            |
| Axial Spondyloarthritis patients<br>(according to the ASAS criteria or comparable) | not relevant   | not relevant<br>NB need for differentiation in radiographic and non-radiographic axSpA | Extra-articular manifestations (psoriasis, IBD, uveitis)<br>Peripheral manifestations (arthritis, enthesitis, dactylitis)<br>NB manifestations do not need to be the primary outcome |

| Search strategy    |                                                                                                | No. of results |
|--------------------|------------------------------------------------------------------------------------------------|----------------|
| 1                  | exp Spondylitis, Ankylosing/                                                                   | 11862          |
| 2                  | exp Spondyloarthritis/                                                                         | 19312          |
| 3                  | spa.ti,ab.                                                                                     | 7404           |
| 4                  | spondylitis.ti,ab.                                                                             | 12123          |
| 5                  | spondyloarthritis.ti,ab.                                                                       | 794            |
| 6                  | 1 or 2 or 3 or 4 or 5                                                                          | 29896          |
| 7                  | (ra or di or pa).fs.                                                                           | 4299554        |
| 8                  | exp Magnetic Resonance imaging/                                                                | 318500         |
| 9                  | exp Radiology/                                                                                 | 25255          |
| 10                 | radiograph*.ti,ab.                                                                             | 158674         |
| 11                 | radiolog*.ti,ab.                                                                               | 180735         |
| 12                 | MRI.ti,ab.                                                                                     | 145614         |
| 13                 | 8 or 9 or 10 or 11 or 12                                                                       | 656937         |
| 14                 | 6 and 13                                                                                       | 3644           |
| 15                 | 8 or 12                                                                                        | 360377         |
| 16                 | 7 or 9 or 10 or 11                                                                             | 4426227        |
| 17                 | 6 and 15 and 16                                                                                | 1319           |
| 18                 | 14 and 20                                                                                      | 8              |
| 19                 | CASE REPORTS.pt.                                                                               | 1702524        |
| 20                 | 14 not 19                                                                                      | 2873           |
|                    | Total search results                                                                           | 447            |
|                    | Citation pearl growing                                                                         | 1 (extra)      |
| Databases searched | Medline, the Cochrane Central Register of Controlled Trials (CENTRAL) and The Cochrane Library |                |
| Date               | October 1st 2015                                                                               |                |
