# Supplementary material for: Prevalence of peripheral and extra-articular disease in ankylosing spondylitis versus non-radiographic axial spondyloarthritis: a meta-analysis
Source: Springer Nature journal article supplement (doi:10.1186/s13075-016-1093-z), 2016-09-01
Supplement: MOESM2 [file 10640766]

|                                                        | Study     |          |          |      |       |          |          |          |  | For all criteria:         |     |
|--------------------------------------------------------|-----------|----------|----------|------|-------|----------|----------|----------|--|---------------------------|-----|
|                                                        | Esperanza | Gespic   | Kiltz    | SCQM | SPACE | Wallis   | Desir    | ESPAC    |  |                           |     |
| <b>General</b>                                         |           |          |          |      |       |          |          |          |  | <b>Low risk of bias</b>   | +   |
| Funding                                                | +         | +        | +        | +    | ?     | +        | ?        | ?        |  | <b>Minor risk of bias</b> | +/- |
| Role of funding organization                           | +         | ?        | +        | +    | ?     | ?        | ?        | ?        |  | <b>Major risk of bias</b> | -   |
| Conflict of interest                                   | +         | +/-      | +        | +/-  | +     | ?        | +        | +        |  | <b>Poor reporting</b>     | ?   |
| Ethical approval                                       | +         | +        | +        | +    | +     | +        | +        | +        |  |                           |     |
| Aim of study: included differences between AS/nr-axSpA | +         | +        | +        | +/-  | +     | +        | +/-      | +        |  |                           |     |
| Study design (retrospective = possible bias)           | +         | +        | +        | +    | +     | +        | +        | +        |  |                           |     |
| <b>Total</b>                                           | low       | low      | low      | low  | low   | low      | low      | low      |  |                           |     |
| <b>External validity</b>                               |           |          |          |      |       |          |          |          |  |                           |     |
| Sampling of subjects                                   | +/-       | +        | +        | +    | +/-   | +/-      | +        | +        |  |                           |     |
| Nongeneral population based sampling method            | +/-       | +/-      | +        | +    | +/-   | +/-      | +        | +        |  |                           |     |
| Nongeneral population based sampling frame             | +/-       | +/-      | +        | +    | +     | +/-      | +        | +        |  |                           |     |
| Assessment of sampling bias                            | ?         | ?        | ?        | ?    | ?     | ?        | ?        | ?        |  |                           |     |
| Response rate in total sample (% missing)              | +         | ?        | +        | ?    | +     | ?        | +        | ?        |  |                           |     |
| Exclusion rate from the analysis                       | +         | ?        | ?        | +    | +     | ?        | +        | ?        |  |                           |     |
| Address sampling bias                                  | -         | -        | -        | -    | +     | -        | -        | -        |  |                           |     |
| Subject flow                                           | ?         | ?        | +        | +    | +     | ?        | ?        | ?        |  |                           |     |
| <b>Total</b>                                           | low       | high     | low      | low  | low   | high     | low      | intermed |  |                           |     |
| <b>Internal validity</b>                               |           |          |          |      |       |          |          |          |  |                           |     |
| Source of measure of prevalence                        | ?         | ?        | ?        | +    | +     | ?        | ?        | ?        |  |                           |     |
| Validation                                             | ?         | ?        | ?        | +    | +     | ?        | ?        | ?        |  |                           |     |
| Reliability of the estimates                           | +/-       | ?        | ?        | +    | ?     | ?        | ?        | ?        |  |                           |     |
| Outcome measured differently in AS and in nr-axSpA     | +         | +        | +        | +    | +     | +        | +        | +        |  |                           |     |
| Precision of estimate (95% CI, <i>p</i> -value)        | +         | +        | +        | +    | +     | +        | +        | +        |  |                           |     |
| Prevalence in AS and in nr-axSpA                       | +         | +        | +        | +    | +     | +        | +        | +        |  |                           |     |
| <b>Total</b>                                           | low       | intermed | intermed | low  | low   | intermed | intermed | intermed |  |                           |     |
